# Supplementary material for: Electrical control of biexciton Auger recombination in single CdSe/CdS nanocrystals
Source: Royal Society of Chemistry journal article supplement (doi:10.1039/d2nr00305h), 2022-01-01
Supplement: d2nr00305h1.pdf [file d2nr00305h1.pdf]

## Electronic Supplementary Information

### Electrical Control of Biexciton Auger Recombination in Single CdSe/CdS Nanocrystals

Ying Tang,<sup>a</sup> Qilin Qin,<sup>a</sup> Hongyu Yang,<sup>b</sup> Shengnan Feng,<sup>a</sup> Chunfeng Zhang,<sup>a</sup> Jiayu Zhang,<sup>\*b</sup> Min Xiao,<sup>ac</sup> and Xiaoyong Wang<sup>\*a</sup>

<sup>a</sup>National Laboratory of Solid State Microstructures, School of Physics, and Collaborative Innovation Center of Advanced Microstructures, Nanjing University, Nanjing 210093, China

<sup>b</sup>Advanced Photonics Center, School of Electronic Science and Engineering, Southeast University, Nanjing 210096, China

<sup>c</sup>Department of Physics, University of Arkansas, Fayetteville, Arkansas 72701, USA

\*Correspondence to J.Z. (jyzhang@seu.edu.cn) or X.W. (wxiaoyong@nju.edu.cn)

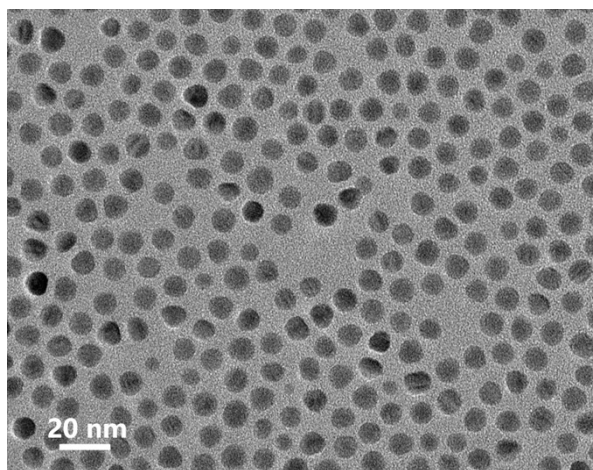

**Fig. S1** Transmission electron microscopy image of CdSe/CdS *g*NCs.

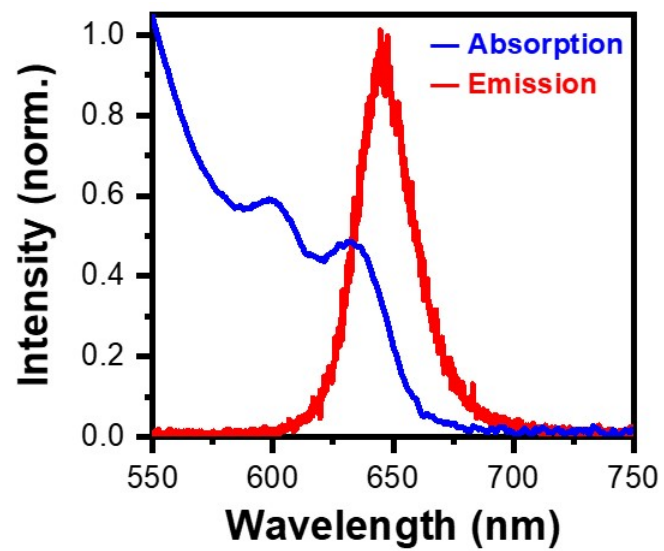

**Fig. S2** Solution absorption and emission spectra of CdSe/CdS *g*NCs.

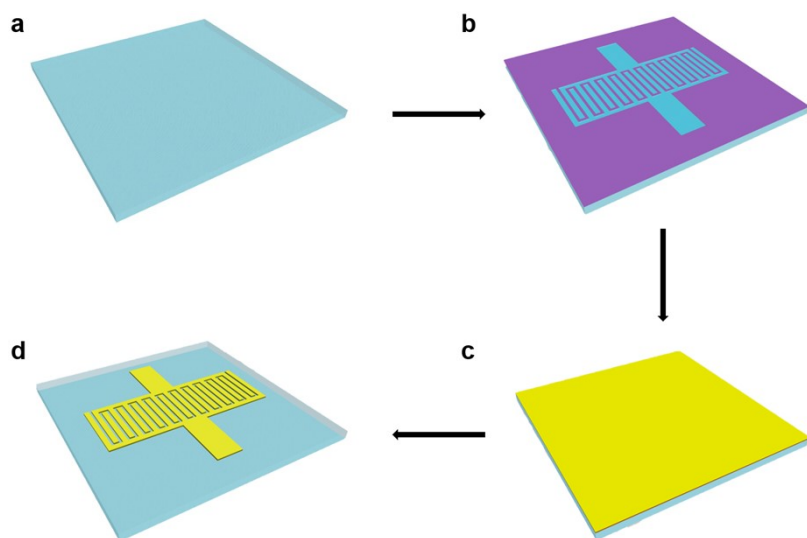

**Fig. S3** Fabrication of electrodes. **(a)** A clean glass substrate was first prepared. **(b)** The substrate was next spin-coated with the photoresist, on top of which an interdigitated pattern was printed by extreme ultraviolet (EUV) lithography using a photomask. **(c)** The Au and Cr layers with the respective thicknesses of 80 and 5 nm were then deposited by the physical vapor deposition (PVD) system. **(d)** Finally, the substrate was soaked in acetone and ultrasonically cleaned for about 10 min to lift off the photoresist. In the as-fabricated sample, each electrode had a width of 10  $\mu\text{m}$  and the two nearby electrodes were spatially separated by 5  $\mu\text{m}$ .

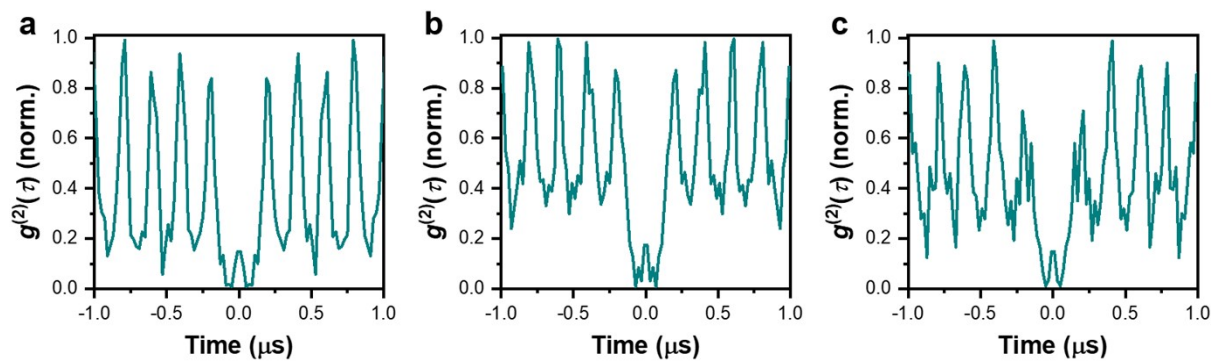

**Fig. S4** Second-order photon correlation curves measured at  $\langle N \rangle = \sim 0.1$  for three single CdSe/CdS  $g$ NCs with the  $g^{(2)}(0)$  values of **(a)**  $\sim 0.145$ , **(b)**  $\sim 0.160$  and **(c)**  $\sim 0.149$ , respectively.

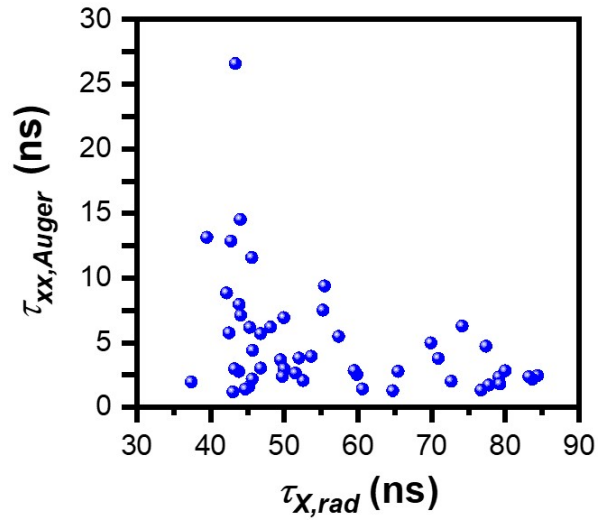

**Fig. S5** The biexciton Auger lifetime  $\tau_{XX,Auger}$  plotted as a function of the single-exciton radiative lifetime  $\tau_{X,rad}$  for  $\sim 50$  single CdSe/CdS gNCs excited at  $\langle N \rangle = \sim 0.5$  without the electric field.

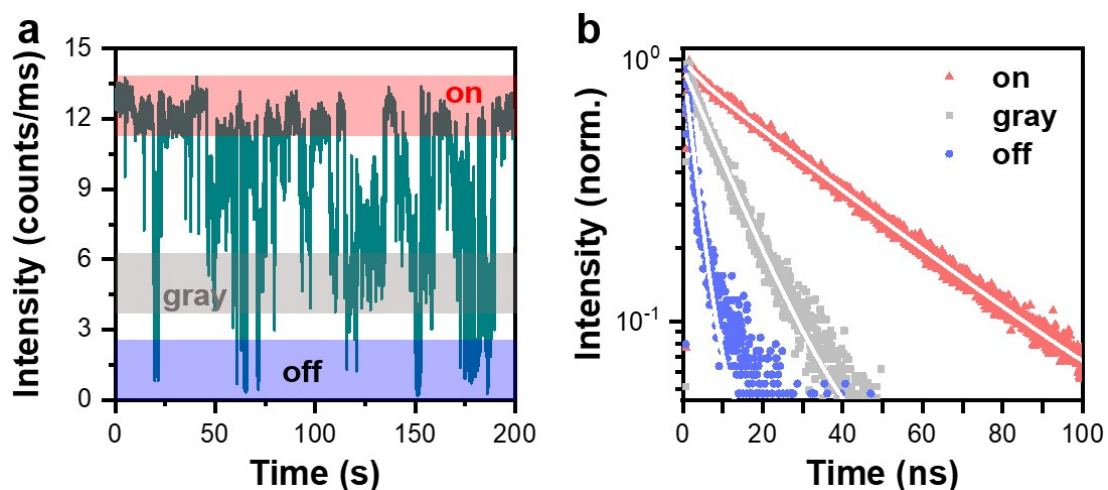

**Fig. S6 (a)** PL intensity time trace measured with a binning time of 10 ms for a single CdSe/CdS *g*NC excited at  $\langle N \rangle = \sim 0.5$ , where the “on”, “gray” and “off” states are marked by the red, gray and blue shadings, respectively. **(b)** PL decay curves extracted from (a) for the “on”, “gray” and “off” states, respectively. The PL decay curve of “on” state is fitted by a bi-exponential function with the fast and slow lifetimes of  $\sim 3.5$  and  $\sim 36.8$  ns, respectively. The PL decay curves of “gray” and “off” states are both fitted by the single-exponential functions with the respective lifetimes of  $\sim 11.8$  and  $\sim 3.2$  ns, respectively.

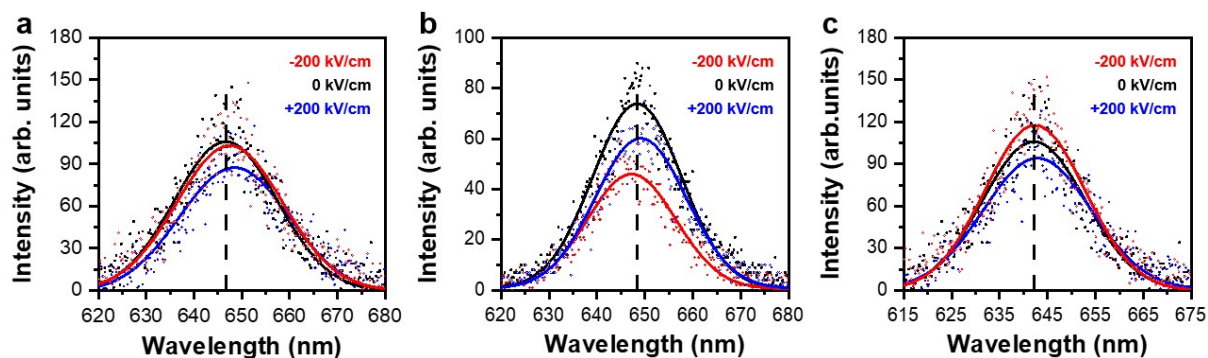

**Fig. S7 (a)** PL spectra measured at  $\langle N \rangle = \sim 0.1$  for a single CdSe/CdS gNC, showing a red shift when the electric field of either 200 or -200 kV/cm is applied. **(b)** PL spectra measured at  $\langle N \rangle = \sim 0.1$  for a single CdSe/CdS gNC, showing a red (blue) shift when the electric field of 200 (-200) kV/cm is applied. **(c)** PL spectra measured at  $\langle N \rangle = \sim 0.1$  for a single CdSe/CdS gNC, showing no obvious shift in the PL peak when the electric field of either 200 or -200 kV/cm is applied. In (a)-(c), the black dashed lines mark the peak positions of the zero-field PL spectra.



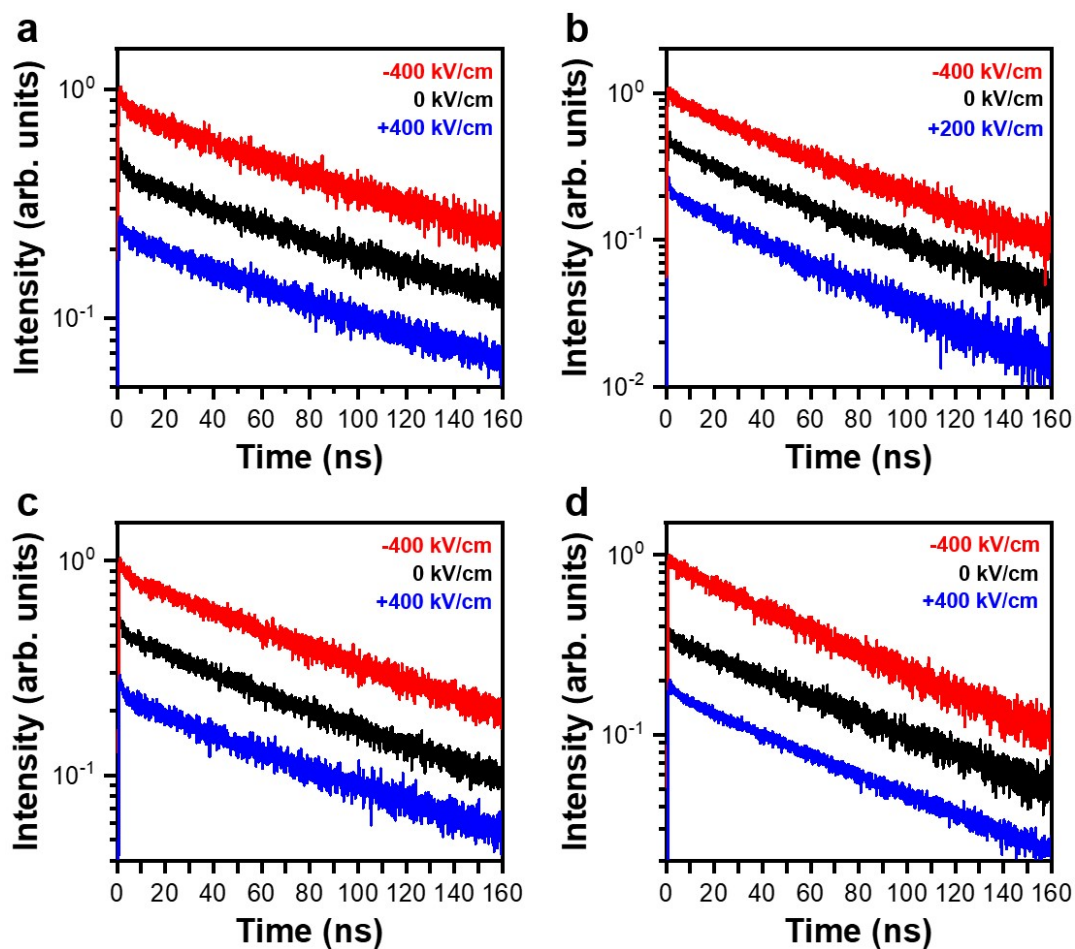

**Fig. S8** (a) PL decay curves measured for a single CdSe/CdS *g*NC from the first type at the electric fields of -400, 0 and 400 kV/cm, respectively. (b) PL decay curves measured for a single CdSe/CdS *g*NC from the second type at the electric fields of -400, 0 and 200 kV/cm, respectively. (c) PL decay curves measured for a single CdSe/CdS *g*NC from the third type at the electric fields of -400, 0 and 400 kV/cm, respectively. (d) PL decay curves measured for a single CdSe/CdS *g*NC from the fourth type at the electric fields of -400, 0 and 400 kV/cm, respectively. In (a)-(d), the three PL decay curves are offset to each other for clarity.

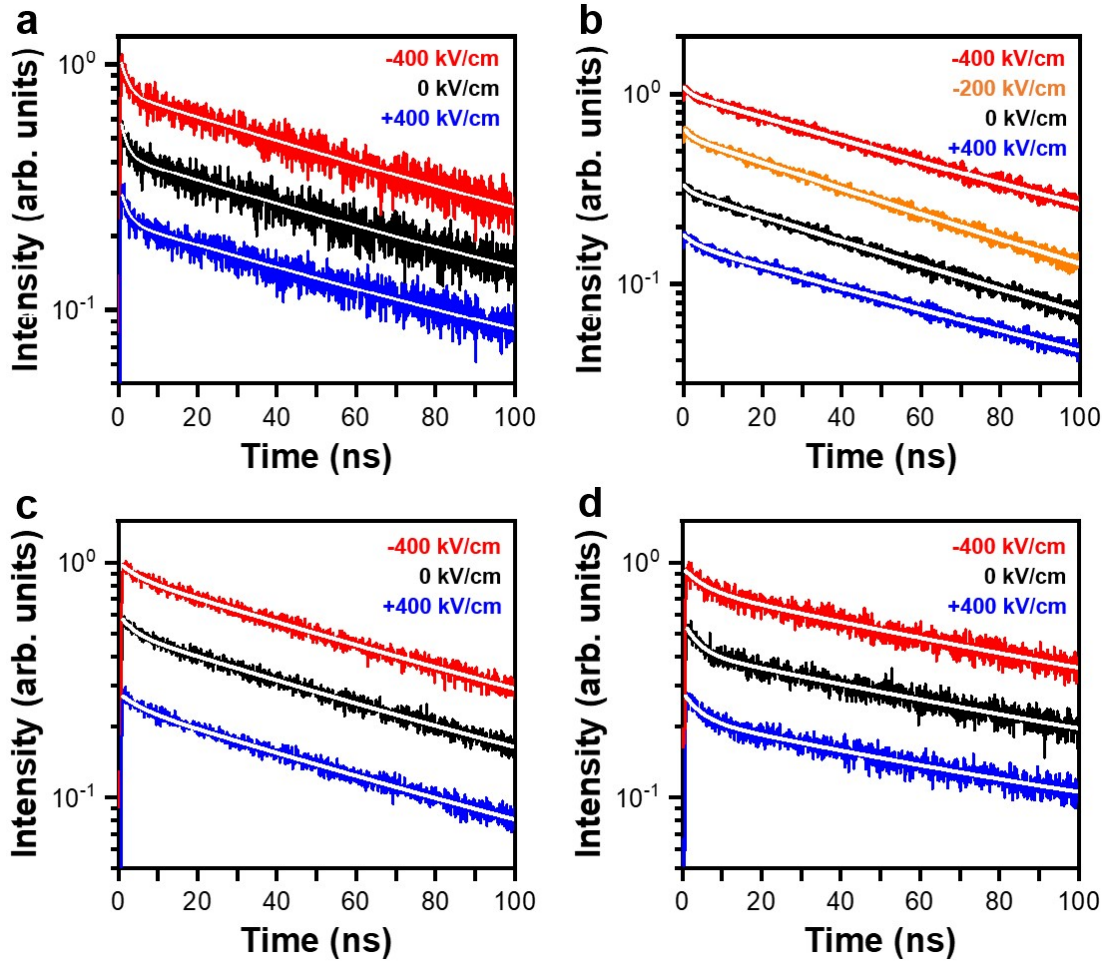

**Fig. S9 (a)** PL decay curves measured at  $\langle N \rangle = \sim 0.5$  for a single CdSe/CdS gNC from the first type and each fitted by the solid line using a bi-exponential function. At 0 kV/cm, the obtained  $\tau_{X, rad}$ ,  $\tau_{XX, total}$  and  $\tau_{XX, Auger}$  values are  $\sim 77.7$ ,  $\sim 1.6$  and  $\sim 1.7$  ns, respectively. At -400 kV/cm, the obtained  $\tau_{X, rad}$ ,  $\tau_{XX, total}$  and  $\tau_{XX, Auger}$  values are  $\sim 83.0$ ,  $\sim 1.9$  and  $\sim 2.1$  ns, respectively. At 400 kV/cm, the obtained  $\tau_{X, rad}$ ,  $\tau_{XX, total}$  and  $\tau_{XX, Auger}$  values are  $\sim 82.2$ ,  $\sim 1.9$  and  $\sim 2.1$  ns, respectively. **(b)** PL decay curves measured at  $\langle N \rangle = \sim 0.5$  for a single CdSe/CdS gNC from the second type and each fitted by the solid line using a bi-exponential function. At 0 kV/cm, the obtained  $\tau_{X, rad}$ ,  $\tau_{XX, total}$  and  $\tau_{XX, Auger}$  values are  $\sim 64.2$ ,  $\sim 1.8$  and  $\sim 2.1$  ns, respectively. At -400 kV/cm, the obtained  $\tau_{X, rad}$ ,  $\tau_{XX, total}$  and  $\tau_{XX, Auger}$  values are  $\sim 69.9$ ,  $\sim 2.2$  and  $\sim 2.5$  ns, respectively. At -200 kV/cm, the obtained  $\tau_{X, rad}$ ,  $\tau_{XX, total}$  and  $\tau_{XX, Auger}$  values are  $\sim 61.6$ ,  $\sim 1.6$  and  $\sim 1.8$  ns, respectively. At 400 kV/cm, the obtained  $\tau_{X, rad}$ ,  $\tau_{XX, total}$  and  $\tau_{XX, Auger}$  values are  $\sim 72.0$ ,  $\sim 3.3$  and  $\sim 4.0$  ns, respectively. The PL peak is blue-shifted at -200 kV/cm and red-shifted at  $\pm 400$  kV/cm, as compared to the one measured at 0 kV/cm. **(c)** PL decay curves

measured at  $\langle N \rangle = \sim 0.5$  for a single CdSe/CdS *g*NC from the third type and each fitted by the solid line using a bi-exponential function. At 0 kV/cm, the obtained  $\tau_{X,rad}$ ,  $\tau_{XX,total}$  and  $\tau_{XX,Auger}$  values are  $\sim 77.7$ ,  $\sim 3.6$  and  $\sim 4.4$  ns, respectively. At -400 kV/cm, the obtained  $\tau_{X,rad}$ ,  $\tau_{XX,total}$  and  $\tau_{XX,Auger}$  values are  $\sim 80.0$ ,  $\sim 4.5$  and  $\sim 5.9$  ns, respectively. At 400 kV/cm, the obtained  $\tau_{X,rad}$ ,  $\tau_{XX,total}$  and  $\tau_{XX,Auger}$  values are  $\sim 78.9$ ,  $\sim 5.3$  and  $\sim 7.3$  ns, respectively. **(d)** PL decay curves measured at  $\langle N \rangle = \sim 0.5$  for a single CdSe/CdS *g*NC from the fourth type and each fitted by the solid line using a bi-exponential function. At 0 kV/cm, the obtained  $\tau_{X,rad}$ ,  $\tau_{XX,total}$  and  $\tau_{XX,Auger}$  values are  $\sim 107.4$ ,  $\sim 3.7$  and  $\sim 4.3$  ns, respectively. At -400 kV/cm, the obtained  $\tau_{X,rad}$ ,  $\tau_{XX,total}$  and  $\tau_{XX,Auger}$  values are  $\sim 103.6$ ,  $\sim 5.2$  and  $\sim 6.5$  ns, respectively. At 400 kV/cm, the obtained  $\tau_{X,rad}$ ,  $\tau_{XX,total}$  and  $\tau_{XX,Auger}$  values are  $\sim 101.0$ ,  $\sim 4.4$  and  $\sim 5.3$  ns, respectively. In (a)-(d), the three or four PL decay curves are offset to each other for clarity.

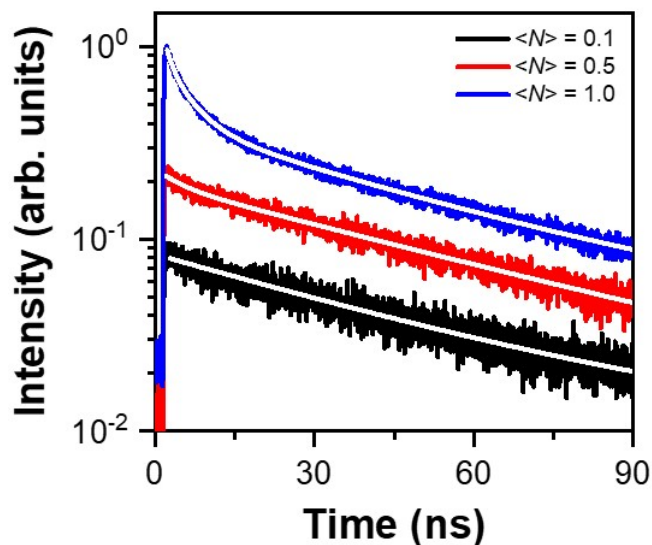

**Fig. S10** PL decay curves measured for a single CdSe/CdS gNC at  $\langle N \rangle = \sim 0.1$ ,  $\sim 0.5$  and  $\sim 1.0$ , respectively. At  $\langle N \rangle = \sim 0.1$ , the PL decay curve can be fitted by a single-exponential function with the lifetime of  $\sim 49.8$  ns; At  $\langle N \rangle = \sim 0.5$ , the PL decay curve can be fitted by a bi-exponential function with the long and short lifetimes of  $\sim 59.0$  and  $\sim 4.4$  ns, respectively; At  $\langle N \rangle = \sim 1.0$ , the PL decay curve can only be fitted by a tri-exponential function with the long, medium and short lifetimes of  $\sim 48.2$ ,  $\sim 4.9$  and  $\sim 1.3$  ns, respectively. The three PL decay curves are offset to each other for clarity.

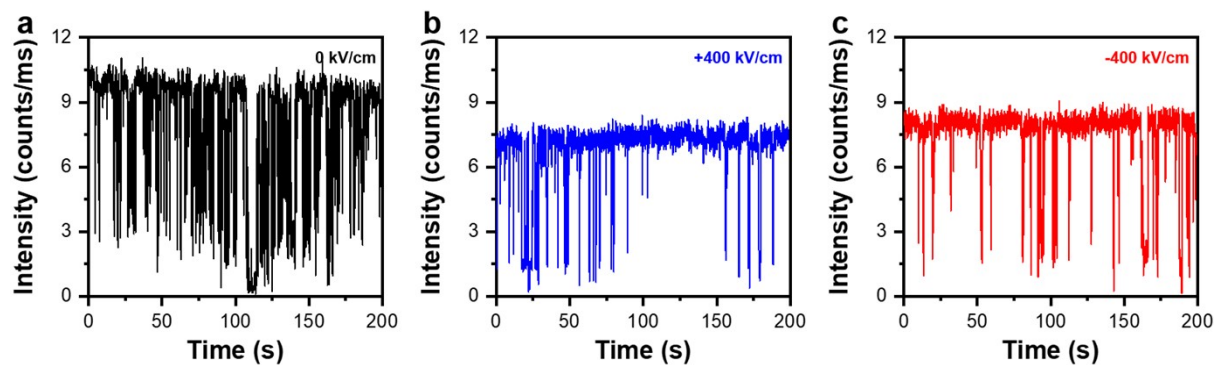

**Fig. S11 (a)-(c)** PL intensity time traces measured with a binning time of 10 ms for a single CdSe/CdS *g*NC excited at  $\langle N \rangle = \sim 0.5$ , showing that the PL blinking effect can be suppressed to some degree at the electric fields of  $\pm 400$  kV/cm. PL decay curves measured for this single CdSe/CdS *g*NC are plotted in Figure S9c, where both the single-exciton radiative lifetime and the biexciton lifetime increase upon the application of a positive or negative electric field.

**Table S1** Classification of the 47 single CdSe/CdS *g*NCs studied in the experiment into four types, according to their different electric-field induced changes in the PL spectra and PL lifetimes. Here X and XX denote single exciton and biexciton, respectively.

| <b>Types</b>   | <b>PL spectra</b>                 | <b>PL lifetimes</b>                                                     |
|----------------|-----------------------------------|-------------------------------------------------------------------------|
| Type 1 (5/47)  | symmetric shift about zero field  | increase for both X and XX                                              |
| Type 2 (4/47)  | asymmetric shift about zero field | increase for X and XX (red shift)<br>decrease for X and XX (blue shift) |
| Type 3 (30/47) | no shift with the field           | increase for both X and XX                                              |
| Type 4 (8/47)  | no shift with the field           | decrease for X and increase for XX                                      |
